# Supplementary material for: Hypertriglyceridemia Is Associated with More Severe Histological Glomerulosclerosis in IgA Nephropathy
Source: MDPI journal article supplement (doi:10.3390/jcm10184236), 2021-09-18
Supplement: s1 [file s1]

# Supplementary Materials

**Table S1.** The Oxford MEST classification of TG groups.

|   |   | TG Group1<br><150 | TG Group2<br>≥150 | <i>p</i> -value |
|---|---|-------------------|-------------------|-----------------|
| M | 0 | 10 (17.5)         | 6 (10.5)          | 0.915           |
|   | 1 | 25 (43.9)         | 16 (28.1)         |                 |
| E | 0 | 28 (49.1)         | 13(22.8)          | 0.087           |
|   | 1 | 7 (12.3)          | 9 (15.8)          |                 |
| S | 0 | 27 (47.4)         | 14(24.6)          | 0.269           |
|   | 1 | 8 (14.0)          | 8(14.0)           |                 |
| T | 0 | 25(43.9)          | 14(24.6)          | 0.300           |
|   | 1 | 9(15.8)           | 5(8.8)            |                 |
|   | 2 | 1(1.8)            | 3(5.3)            |                 |

Abbreviations: Oxford classification: M; mesangial hypercellularity, E; endocapillary proliferation, S; segmental sclerosis, T; tubular atrophy/interstitial fibrosis.

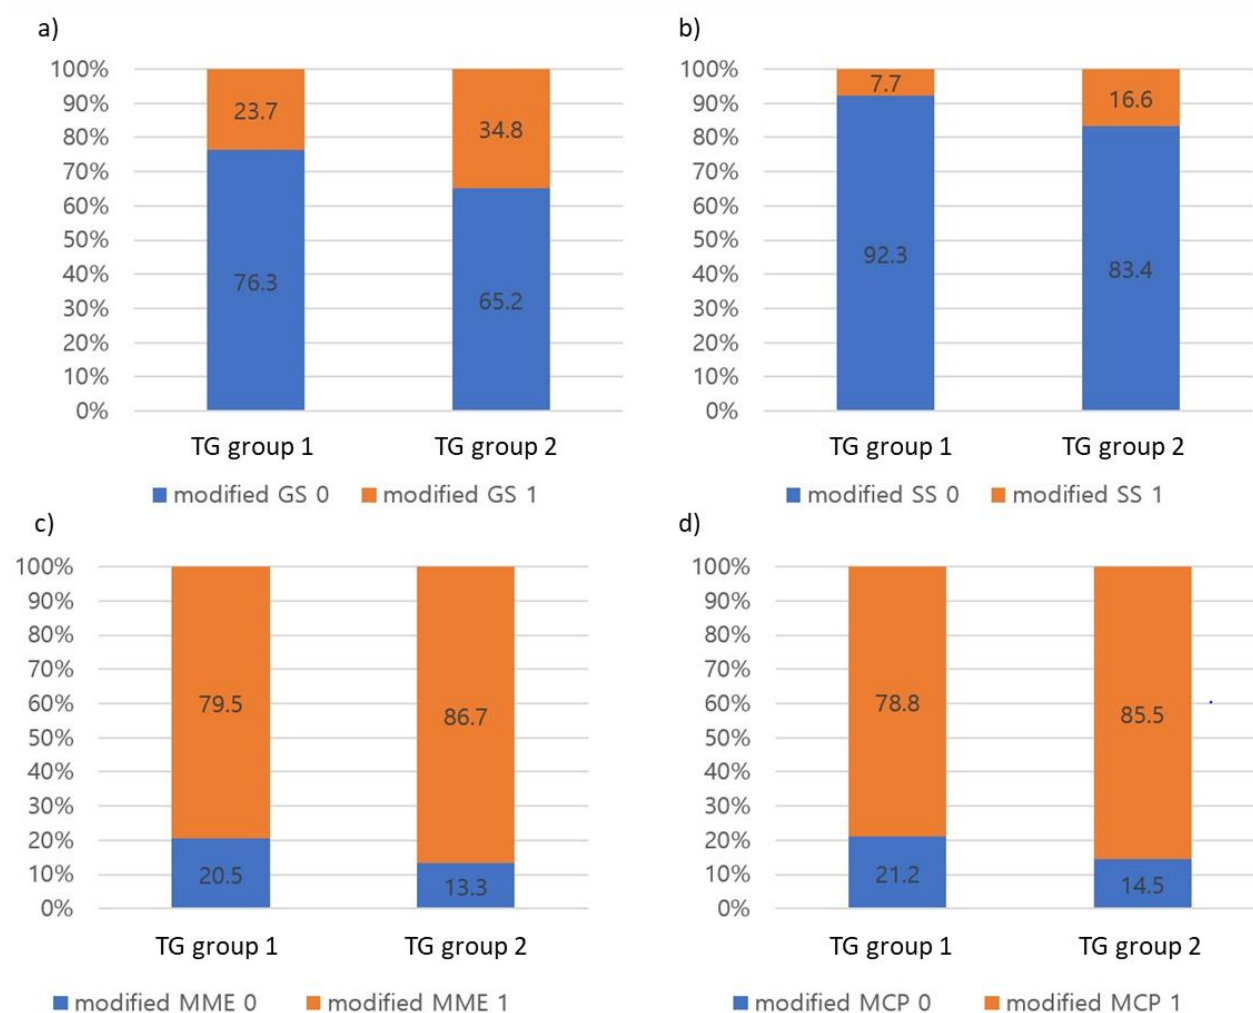

**Figure S1.** The distribution of modified scores of global sclerosis (GS), segmental sclerosis (SS), mesangial matrix expansion (MME), mesangial cell proliferation (MCP). (a) Distribution of modified GS scores for TG groups, (b) Distribution of modified SS scores for TG groups, (c) Distribution of modified MME scores for TG groups, (d) Distribution of modified MCP scores for TG groups.

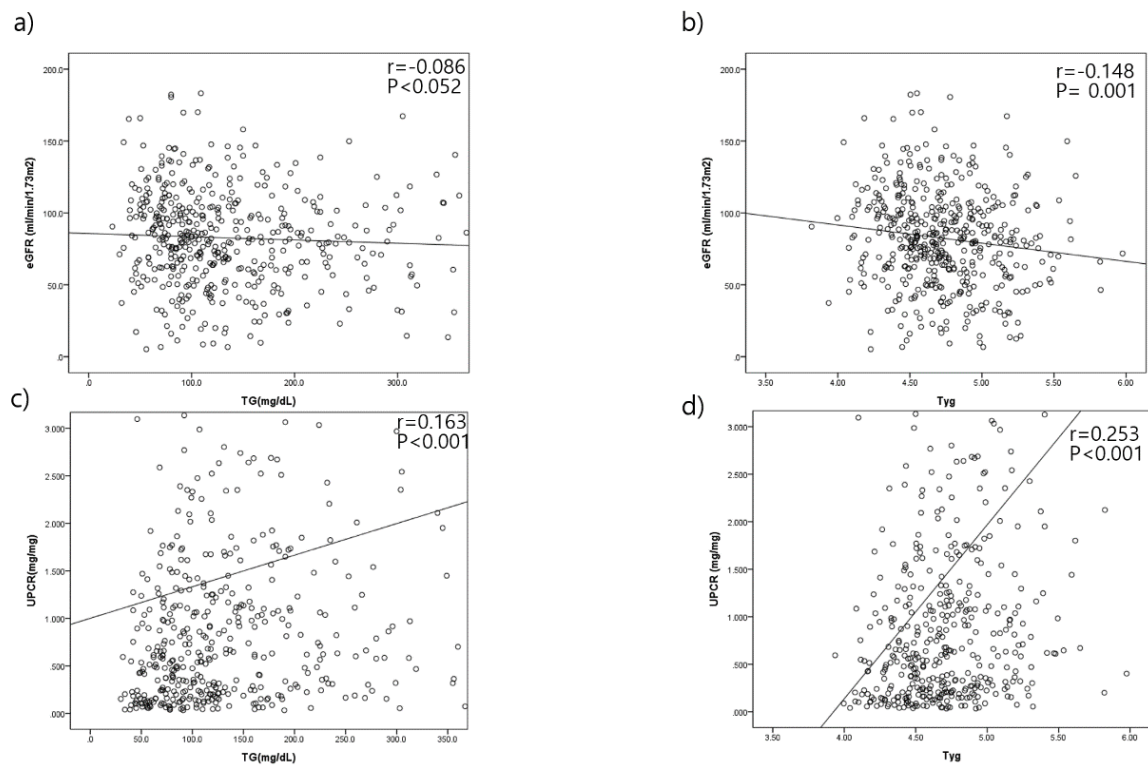

**Figure S2.** Pearson correlation graph TG and TyG with eGFR and Urine P/Cr. (a) Correlation graph between TG and eGFR ( $r = -0.086$ ,  $p < 0.052$ ), (b) Correlation graph between TyG and eGFR ( $r = -0.148$ ,  $p = 0.001$ ), (c) Correlation graph between TG and UPCR ( $r = 0.163$ ,  $p < 0.001$ ), (d) Correlation graph between TyG and UPCR ( $r = 0.253$ ,  $p < 0.001$ ).
